# Supplementary material for: Reward uncertainty asymmetrically affects information transmission within the monkey fronto-parietal network
Source: PubMed Central journal article supplement (PMC7578031; doi:10.1038/s42003-020-01320-6), 2020-10-21
Supplement: 42003_2020_1320_MOESM2_ESM.pdf [file 42003_2020_1320_MOESM2_ESM.pdf]

## **Description of Additional Supplementary Files**

**File Name:** Supplementary Data 1

**Description:** Source data for Fig 1d.

**File Name:** Supplementary Data 2

**Description:** Source data for Fig 2.

**File Name:** Supplementary Data 3

**Description:** Source data for Fig 3. The excel file includes four sheets corresponding to the PSTHs and Line plots from dIPFC and 7A.

**File Name:** Supplementary Data 4

**Description:** Source data for Fig 4. The excel file includes two sheets corresponding to the Fig 4a and Fig 4b.

**File Name:** Supplementary Data 5

**Description:** Source data for Fig 5.

**File Name:** Supplementary Data 6

**Description:** Source data for Fig 6, insets. The excel file includes two sheets corresponding to the areas.

**File Name:** Supplementary Data 7

**Description:** Source data for Fig 7. The excel file includes two sheets corresponding to the Fig 7 a-b and Fig 7 c-f.
